# Supplementary material for: Degradable pH-responsive NIR-II imaging probes based on a polymer-lanthanide composite for chemotherapy
Source: Royal Society of Chemistry journal article supplement (doi:10.1039/d0dt02042g), 2020-01-01
Supplement: d0dt02042g1.pdf [file d0dt02042g1.pdf]

## Supporting information

### **Degradable pH-responsive NIR-II imaging probes based on polymer-lanthanide composite for chemotherapy**

Miao Feng,<sup>a</sup> Yanxing Wang,<sup>a</sup> Bi Lin,<sup>a</sup> Xiangrong Peng,<sup>a</sup> Ying Yuan,<sup>b</sup> Xiaofeng Tao,<sup>b,\*</sup> and Ruichan Lv,<sup>a,\*</sup>

<sup>a</sup>Engineering Research Center of Molecular and Neuro Imaging, Ministry of Education, School of Life Science and Technology, Xidian University, Xi'an, Shaanxi 710071, China

<sup>b</sup>Department of Radiology, School of Medicine, Shanghai Ninth People's Hospital, Shanghai Jiao Tong University, Shanghai 200011, China.

---

Corresponding author:

E-mail: [cjr.taoxiaofeng@vip.163.com](mailto:cjr.taoxiaofeng@vip.163.com) (X. Tao); [rclv@xidian.edu.cn](mailto:rclv@xidian.edu.cn) (R. Lv)

## Experiments and Materials

**Phase Transfer of UCNP@mSiO<sub>2</sub>.** Typically, a beaker containing 30 mL of deionized water and 0.15 g of CTAB was placed in an ultrasonic cleaner to obtain a transparent solution. Then, 3 mL of cyclohexane solution containing UCNP (20 mg mL<sup>-1</sup>) was added. The mixture was then stirred vigorously under room temperature overnight to obtain a homogeneous UCNP-CTAB solution. After that, the UCNP-CTAB aqueous solution, 6 mL of ethanol, and 200  $\mu$ L of NaOH (2 M) were mixed, and the mixture was heated to 70 °C under stirring. Then, 150  $\mu$ L of TEOS mixture was added slowly into the solution and stirred vigorously for 10 min. The precipitation was centrifuged and washed with ethanol several times, and the UCNP@SiO<sub>2</sub> was obtained.

The CTAB template was extracted by ion exchange process. Typically, UCNP@SiO<sub>2</sub> was added into 30 mL of ethanol solution together with 0.08 g of NH<sub>4</sub>NO<sub>3</sub>, and the mixture was heated and kept at 60 °C for 2 h. Then, the UCNP@mSiO<sub>2</sub> were obtained after centrifugation with deionized water for three times.

**Animal model.** The female BALB/c mice (aged 5-6 weeks) used in these experiments were obtained from the School of Pharmacy's Ethics Committee of Xi'an Jiaotong University. The tumor passage was by the mince-trocar technique. The tumor, designated 4T1, was derived from a mice breast cancer. 4T1 tumor model was injection of 4T1 cells in PBS (1\*10<sup>6</sup>, 50  $\mu$ L) into the right buttock of mice. When the tumor size reached 0.045 cm<sup>3</sup>, the in vivo assays were performed.

**In vivo Toxicity of DMDN.** The tumor-bearing mice were randomized into two groups (n=3, each group) and were treated by intratumoral injection with DMDN and PBS (blank control). The injected material is 100  $\mu$ L (1 mg/mL) every 2 days. The tumor sizes of all BALB/c mice were monitored by a digital caliper and calculated by the equation:

$$V_{\text{tumor}} = LW^2/2$$

(*L*: tumor length, *W*: tumor width).

In each injection, the weight of nude mice and tumor volume were measured. After two weeks of treatment, the BALB/c mice were sacrificed. The main organs and tumor tissues were extracted for histological examination. Tumor tissues and main organs were fixed with formalin (10 %), embedded with paraffin and sliced into thin sections. The sections were stained with hematoxylin and eosin (H&E) and observed by an optical microscope.

***In vivo* NIR-II imaging.** *In vivo* NIR-II imaging experiments were performed using a commercial NIR-II imaging system (Grand-Imaging, China). 100  $\mu\text{L}$  (1 mg mL<sup>-1</sup>) of DMDN solution was injected into the mice intravenously, and then NIR-II signals of vessels of the right hind limb of mice.

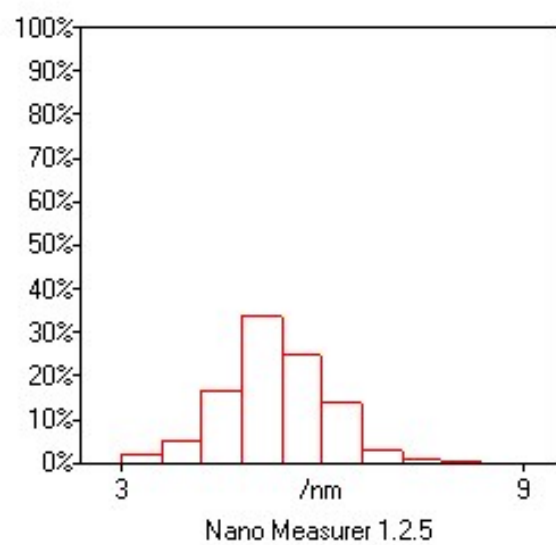

**Fig. S1.** Size distribution of NaGdF<sub>4</sub>:2%Nd@NaLuF<sub>4</sub> nanocrystal.

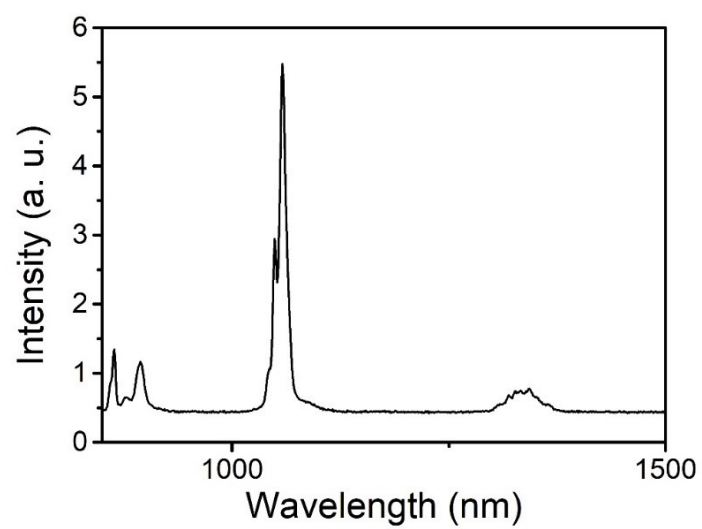

**Fig. S2.** NIR-II luminescence spectra of NaGdF<sub>4</sub>:2%Nd@NaLuF<sub>4</sub> nanocrystal.

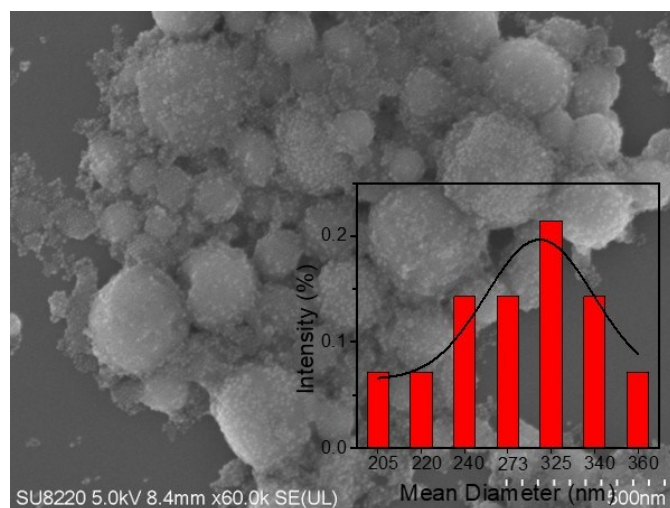

**Fig. S3.** SEM image of DMDN and particle size distribution.

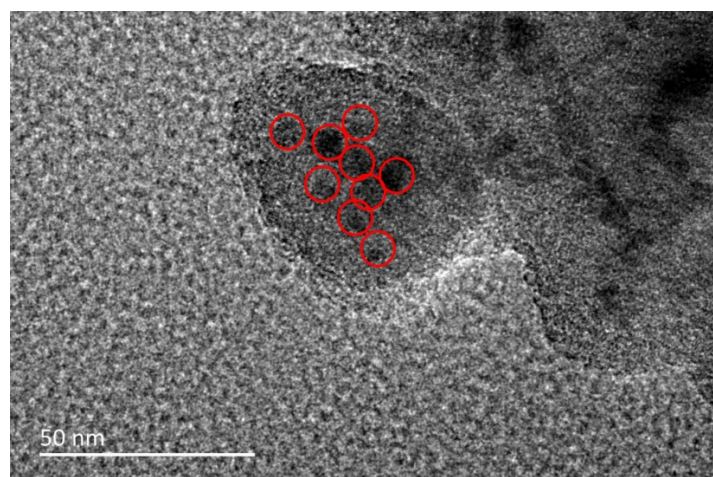

**Fig. S4.** TEM image of ultra-small DCNP@SiO<sub>2</sub>.

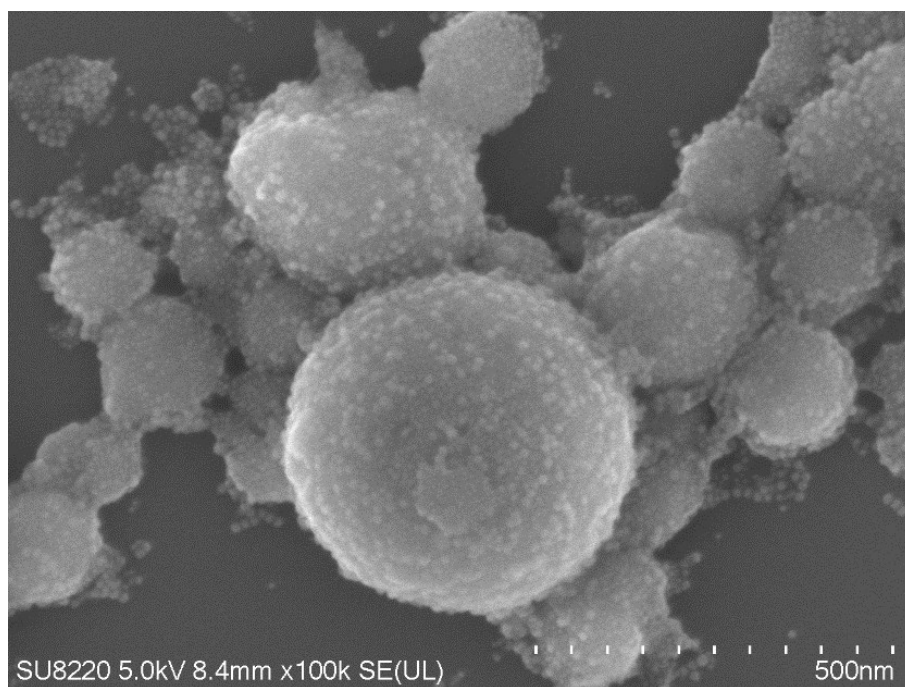

**Fig. S5.** SEM image of UCNP@mPEG-PLGA.



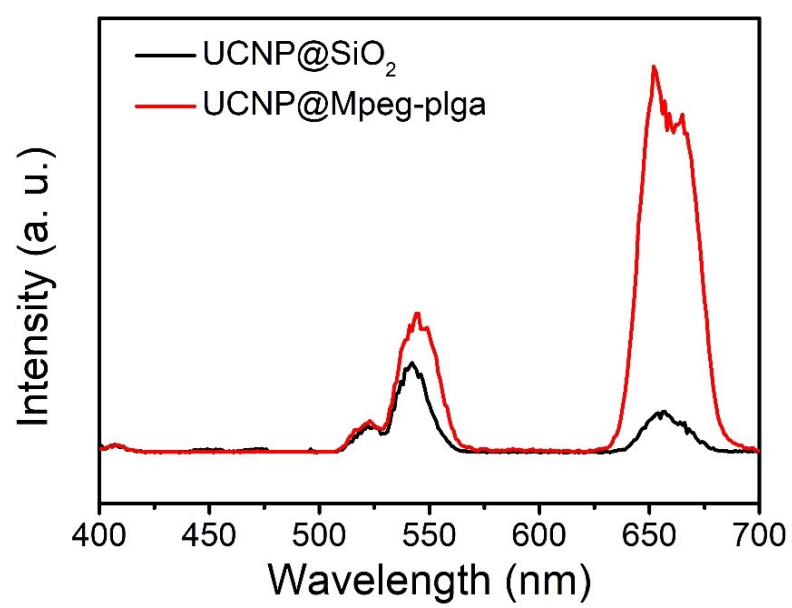

**Fig. S6.** The upconversion luminescence spectra of UCNP@SiO<sub>2</sub> and UCNP@mPEG-PLGA.

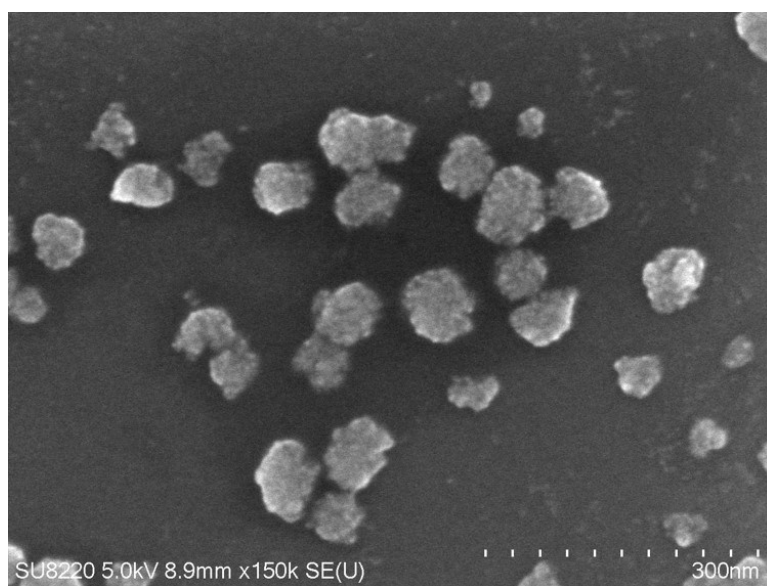

**Fig. S7.** SEM image of hydrolyzed DMDN.

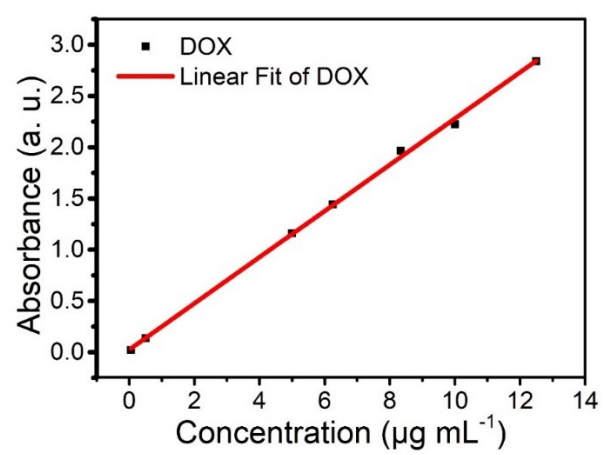

**Fig. S8.** Standard absorbance curve of pure DOX.

| Abs<br>Concentration | Wave<br>length |        |
|----------------------|----------------|--------|
|                      | 414 nm         | 541 nm |
| 31.25                | 0.35           | 0.319  |
| 62.5                 | 0.206          | 0.186  |
| 125                  | 0.226          | 0.205  |
| 250                  | 0.355          | 0.31   |

**Table S1.** Hemolytic experiment results of DMDN.

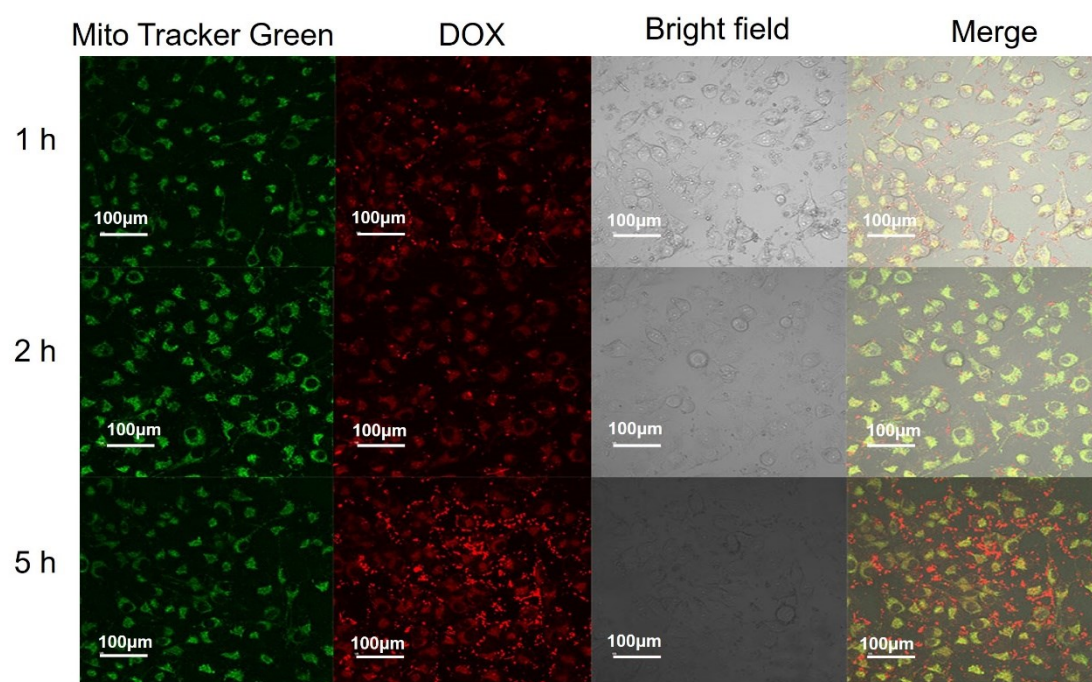

**Fig. S9.** CLSM images of cells incubated with DMDN and marked with Mito-tracker for different time points.

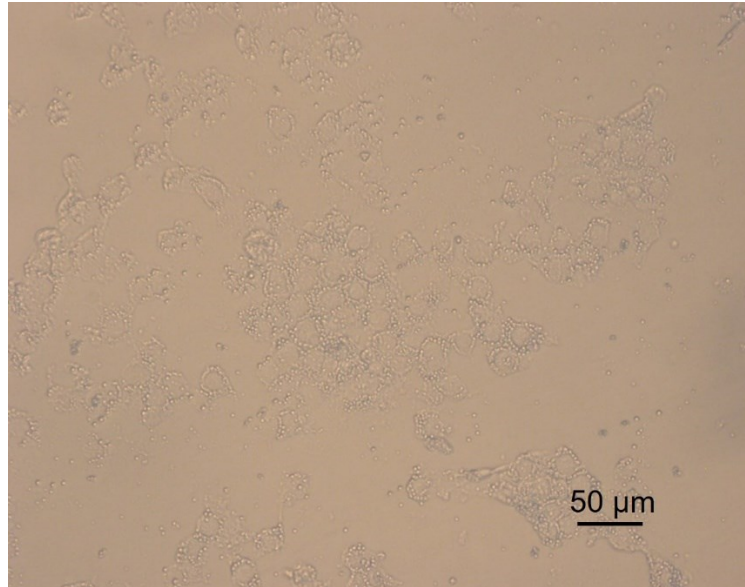

**Fig. S10.** Microscopy images (bright field) of 4T1 cells incubated with DMDN for 48 h.

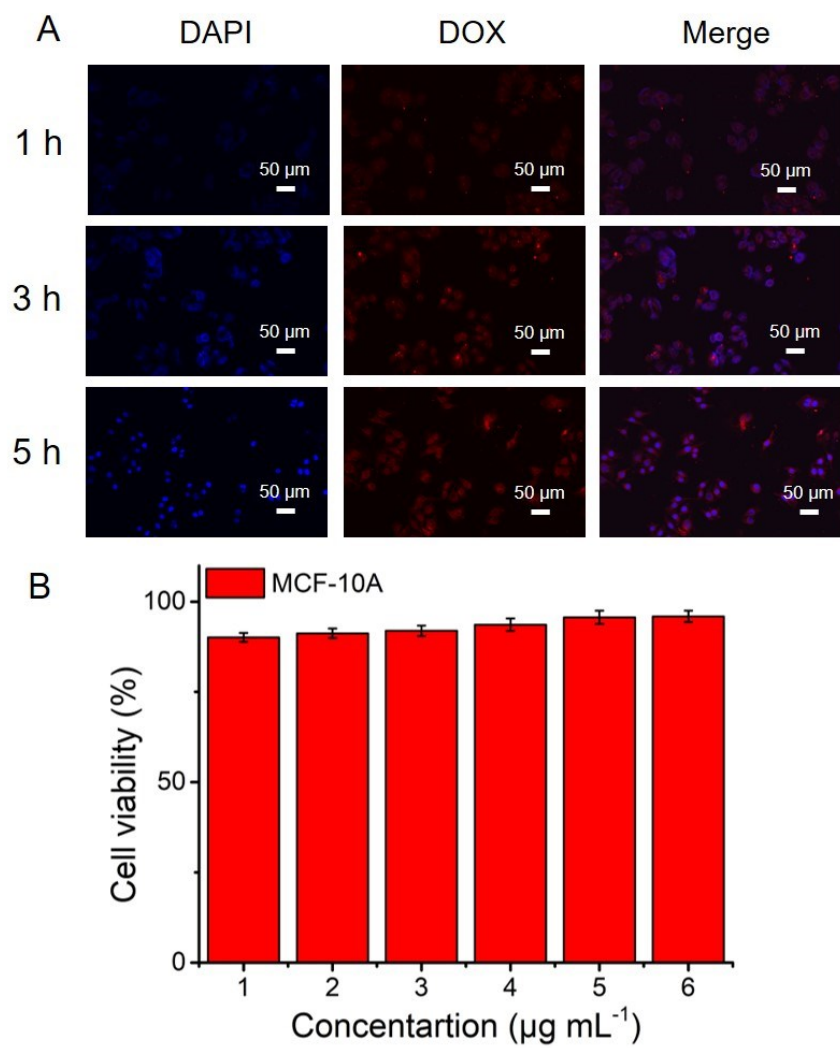

**Fig. S11.** (A) CLSM images (marked with DAPI) and (B) the cell viability of MCF-10A cell incubated with DMDN.

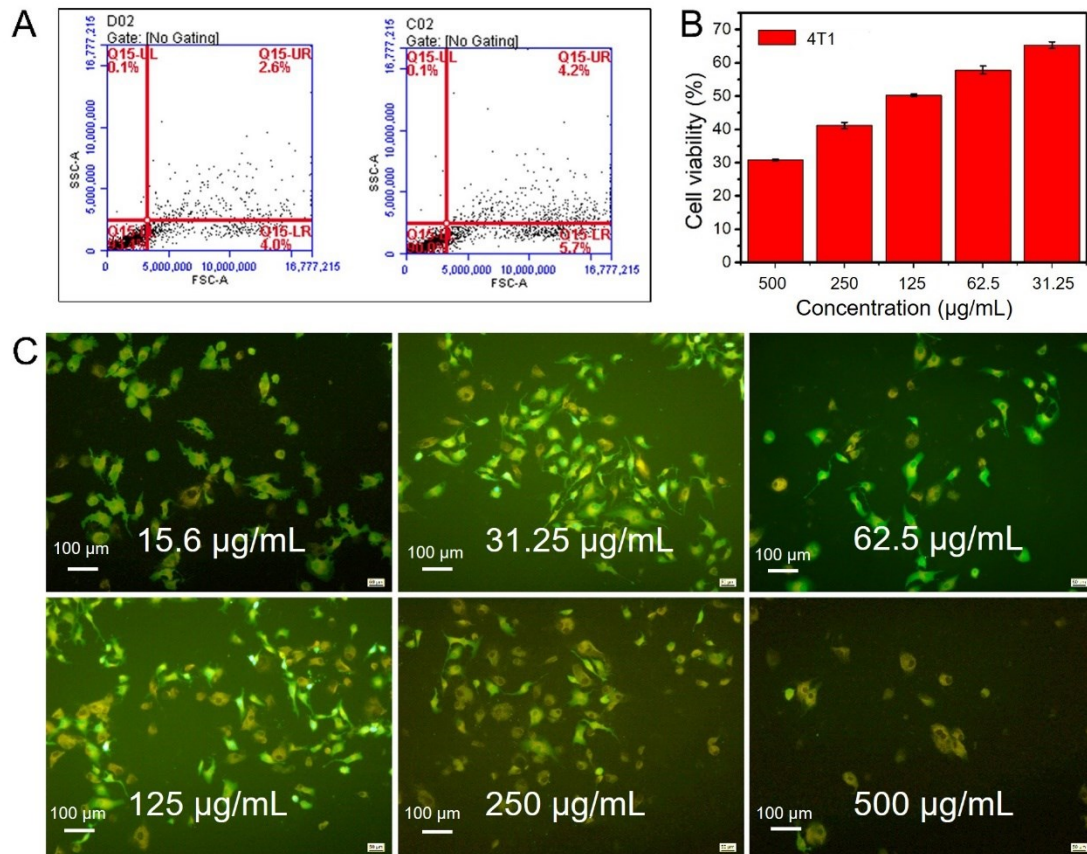

**Fig. S12.** (A) Flow cytometry results of cancer cells incubated with DOX for different incubation time points of 3 h and 6 h, (B) Cell viability and (C) Calcein AM/PI stained microscopy images of cells incubated with different concentrations of DOX.



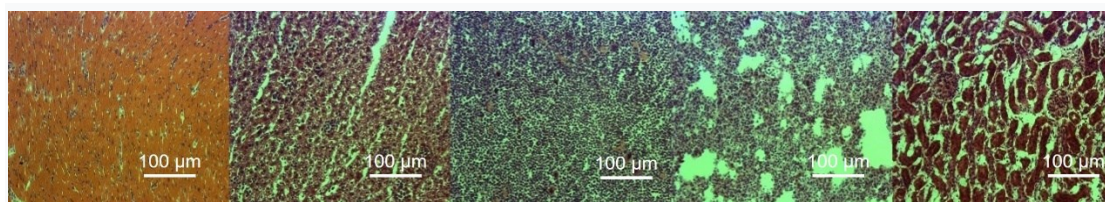

**Fig. S13.** H&E staining microscopy images of heart, liver, spleen, lung, and kidney of mice injected intravenously with DMDN.

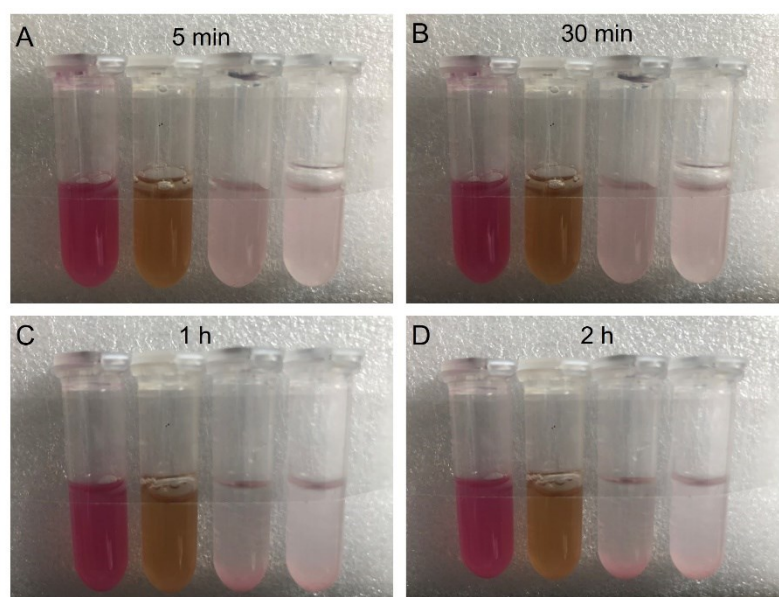

**Fig. S14.** The stability of DMDN in four solutions (FBS, medium, water, and PBS).

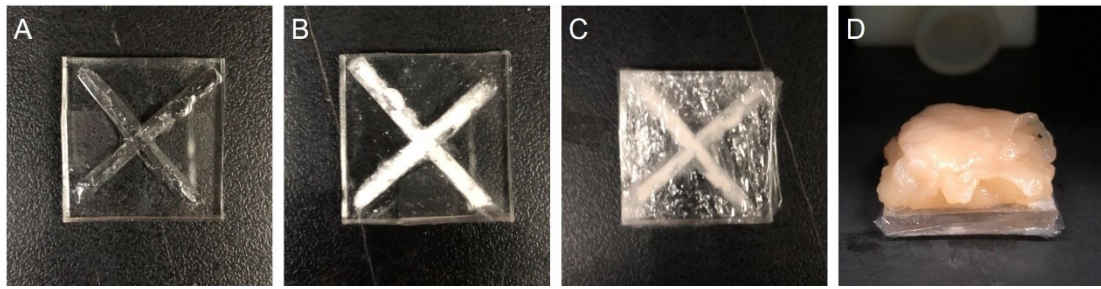

**Fig. S15.** The fabrication process of PDMS substrate with chicken breasts (thickness: 7 mm).

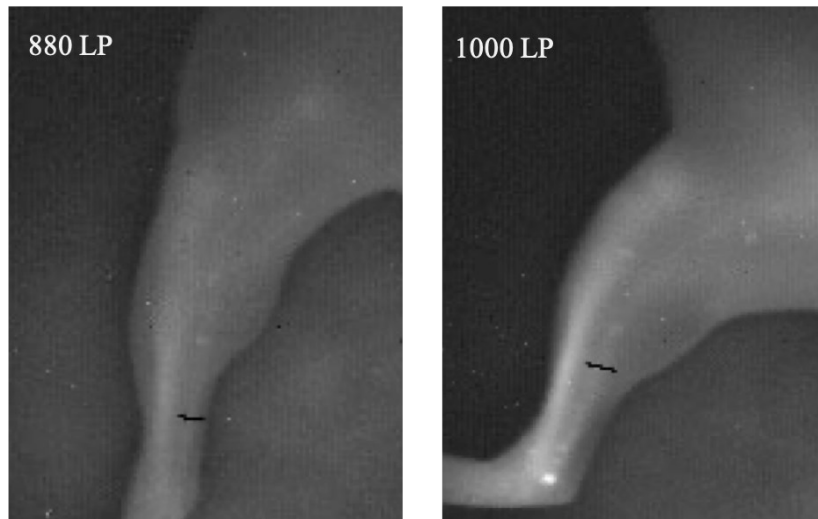

**Fig. S16.** The enlarged view of NIR-II imaging of blood vessels.

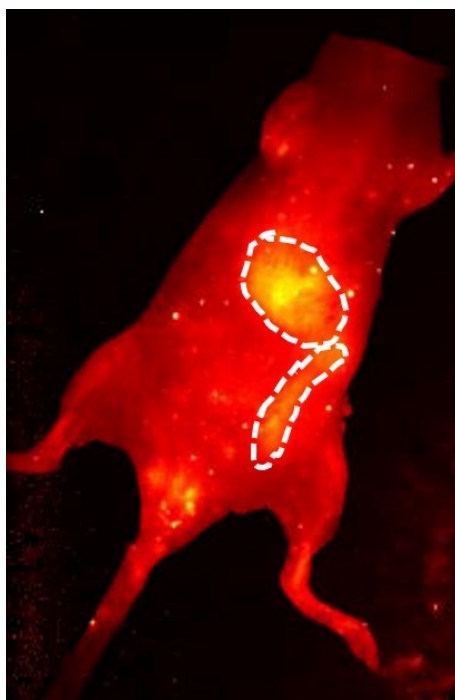

**Fig. S17.** NIR-II imaging of the whole mice after intravenous injection of DMDN.
